# Supplementary material for: Development of an Efficient Protocol to Obtain Transgenic Coffee, Coffea arabica L., Expressing the Cry10Aa Toxin of Bacillus thuringiensis
Source: PubMed Central journal article supplement (PMC6862211; doi:10.3390/ijms20215334), 2019-10-26
Supplement: ijms-20-05334-s001.pdf [file ijms-20-05334-s001.pdf]

Or-atgaaatccatatacaaaataagaatgaatatgaatattcaatgctccatccaatggtttagcaagtctaaactattctagatattccattagcaaaataag  
Op-atgaaCccCtaCcaaaaCaagaatgaataCgaaatTtcaatgcAccatccaaCggCtttagcaagAGCaataactCtcCagataCccattGgcaaaataag  
Aa- M N P Y Q N K N E Y E I F N A P S N G F S K S N N Y S R Y P L A N K

Or-ccaaatcaaccactgaaaaacagcaattacaagaattggctcaatgtgtgcaagataatcaacaatatggcaataatggcgggaattttgctagttctgaa  
Op-ccaaatcaaccactCaaaaaacTaaattacaagaCtggctTaatgtTgtcaagataaCcaacaatatggcaataatgcAggTaattttggctagttctgaa  
Aa- P N Q P L K N T N Y K D W L N V C Q D N Q Q Y G N N A G N F A S S E

Or-actattgttggagttagtgcaaggtattattgttagtaggaactatgtaggagcttttggctgcccctgtcttagctgcaaggtataatattctttggactttg  
Op-actattgttggagttagCgcaaggtattattgtTgtTggaactatgTggtGgcttttggctgCacctgTctCgctgCtgGaaatTAgCtttggCactttg  
Aa- T I V G V S A G I I V V G T M L G A F A A P V L A A G I I S F G T L

Or-ttggcagatcttttggcaaggatctgaccctgcaaatgtttggcaggattgtttaaaccatcgaggaggcctatacaagaaatagataaaaaacataaataat  
Op-CttccAatTttCtggcaaggTtcCgaccAgcTaatgtttggcaggatCtTttGaacatTggaggaggcctatTcaagaaatTgaCaaGaacatTattaat  
Aa- L P I F W Q G S D P A N V W Q D L L N I G G R P I Q E I D K N I I N

Or-gtactaacttctatcgtaacacctataaaaaatcaacttgataaatcaagaatttttgcataaaatgggagccagcagctacacacgctaatgctaaagca  
Op-gtTctTactAGCAtTgtTactTccAataaaaaatcaacttgaCaaatatacaagaatttttgcataaaatgggagccagcagcaAGacacacgctaatgcaAaaGgcT  
Aa- V L T S I V T T P I K N Q L D K Y Q E F D K W E P A R T H A N A K A

Or-gtacctgactctttactaccttagaacctataatagataaaagatttagatattgtaaaaaataatgctagctatcgaaatccaacactccctgcatatgca  
Op-gtTcatgaCTtGttacCacACTGaacAatTatTgataaagaCCTGacCatGtCaaaaatgctTCAtatcgaaatTccaacTtGccAgcatatgct  
Aa- V H D L F T T L E P I I D K D L D M L K N N A S Y R I P T L P A Y A

Or-caaatagctacttggcaacttgaattttataaaacatgctgctacctattacaatatatggctgcaaaatcaaggatataaaatccaagctactttcaattcatct  
Op-caaatTgctacttggcaTttgaaatCtCctCaaacatgctgctacTtattacaatatTggTtgcaaaatcaaggatTaatccaTCCactttTaaCtcCtcC  
Aa- Q I A T W H L N L L K H A A T Y Y N I W L Q N Q G I N P S T F N S S

Or-aattactatcagggtctattttaaaccgtaaaatcaagaatatactgactattgtatacaaacgtacaatgcaggactaactatgattagaactaataactaac  
Op-aaCtactatcaAggTtatCtTaaaAGGaaGatTcaagaatatactgactattgtatTcaaacTcaaatgcaggactaactatgattagaactaataactaac  
Aa- N Y Y L Q G R F I K R K I Q E Y T D Y C I Q T Y N A G L T M I R T N T N

Or-gcaacatggaatattgataataacttaccgtttagaatgactctaactgtgtagactcttattgctatttttccaaatattgaccagaaaaatattccaata  
Op-gcaacatggaatattgataataacttaccAgAttagaatgactctTactgtTttGgaCcttattgctatttttccaaatattgaccagaaaaatattccaatT  
Aa- A T W N M Y N T Y R L E M T L T V L D L I A I F P N Y D P E K Y P I

Or-ggagttaaatctgaacttatcagagaagtttatacgaatgtaattcagatacatttagaacataacagaactagaaaatggattaactagaaaatcctaca  
Op-ggagttaaatcAgaacttatTCgagaagtttatacTaatgtaattAGCgatacTtttagaacTatTacaagaactTgaaaatggaCtTactagaatccAaca  
Aa- G V K S E L I R E V Y T N V N S D T F R T I T E L E N G L T R N P T

Or-ttatttacttggataaaccaagggcgtttttacacaagaatctcgcagacattcttgatccttatgatatttttcttttacaggttaaccagatggccttt  
Op-ttGtttacttggatTaaTcaaggTAgAttCtacaagaatctcAGagacattcttgatccAtatgatatttttcttttacaggttaaccagatggccttt  
Aa- L F T W I N Q G R F I Q Y T R N S R D I L D P Y D I F S F T G N Q M A F

Or-acacatactaatgatgatcgcaacataaatctggggagcggttcatggaatattattttctcaagacacatccaaagtatttctttttatagaacaaaacct  
Op-acacatactaatgatgatAgAaacatTatTtggggCgcTggtcatgTaatattatttccAaagaTaatccaaagtTtttccAtttatagaacaaaacct  
Aa- T H T N D D R N I I W G A V H G N I I S Q D T S K V F P F Y R N K P

Or-attgataaggtcgaaattgtcagacatagagagtagactcagatataatataatgaaatgatatttttccaaatagcagtggaagtatttccagatattcattccaat  
Op-attgaCaaggtcgaaattgtcagacatagagagtagactcCgaCatTatTtatgaaatgatTttCttCAGCaaCagcTCCgaagtTtttccTtatAGCtcaaat  
Aa- I D K V E I V R H R E Y S D I I Y E M I F F S N S S E V F R Y S S N

Or-tcaacaatagaaaataattataaaagaactgattcttatatgattccaaaacaaacatgaaaaataaagaatattggtcactctatcgtatataaaaaact  
Op-tcCacTatTgaaaaataattataaaagaactgacAGTtatatgattccaaaacaaacatgaaaaataaagaatattggtcactctTtcCtataaaaaact  
Aa- S N S T I E N Y K R F Y T A Y M I P K Q T W K E Y G H T L S V I K T

Or-gataattatattttcagtagttagagaagaagaagagttgctatttagttggacacataactagtgttgatttccaaaatacaatagatttagataaacatc  
Op-gaCaattatattTttTAGCgtCgttagagaagaagaagagttgctatttCCTggacacatactagCgttgaCttccaaaatacaatTgaCctTgaCaacatT  
Aa- D N V I F S V V R E R R R V A F S W T H T S V D F Q N T I D L D N I

Or-accaaaatccacgctcctaaagccttgaaggttaagttctgattcggaaaattgtgaaaggtcctgggtcacacaggtggagacttggtaattcttaagatagt  
Op-acTcaaatTcaagctctTaaagccttgaaggtTTCctcCgaCtcCaaaattgtTaaGggCccAggtcacacTgggtggagacttggTattcttaagatTCC  
Aa- T Q I H A L K A L K V S S D S K I V K G P G H T G G D L V I L K D S

Or-atggatttttagagttagattttttaaanaatgtttctcgacaatatacaagtagctattcgttatgctactaatgctccaaagacaacagttattcttaacgga  
Op-atggacCtttagagttagatttttGaaaatgtttctAgacaatatacaagTAgAattAgAtatgctactaatgctccaaagacaacagttattctTactTgga  
Aa- M D F R V R F L K N V S R Q V R I R Y A T N A P K T T V F L T G

Or-atagatactataaggttggagctccctagtagaccacttcccgccaaaacccaaatgctacagatttaacatattgagattttggatattgaaacatttccaaga  
Op-atTgatactatTTCgtTgagctTccATCCacAacttccAgAcaaaaacccaaatgctacagattttGacatattgTgaCtttggatattgaaacatttccaaga  
Aa- I D T I S V E L P S T T S R Q N P N A T D L T Y A D F G Y V T F P R

Or-acagttccaaaataaaaacatttgaaggagaagacacttttataatgaccttatatggtacacaaaatcattcatataatataattgacaaaatcgaaattt  
Op-acagttccaaaataaaaacTtttgaaggagaagacactCtTctTatgacTttGtatggtacacaaaatcattcCtataatatttattgacaaaatcgaaattt  
Aa- T V P N K T F E G E D T L L M T L Y G T P N H S Y N I Y I D K I E F

Or-attccaatcaactcaatctgtatttagattatacagagaagcaaatatagaaaaaacacagaaaaatagtgaaatgattttttgttaat  
Op-attccaatcaactcaactCgtTctTgaCtatacTgaAaaGaaGatTcaAaaGatCgtCaatgaCctTttCgtGaat  
Aa- I P I T Q S V L D Y T E K Q N I E K T Q K I V N D L F V N

**Supplementary figure 1.** Original (Or) and optimized (Op) sequences of the *cry10Aa* gene from *B. thuringiensis* serovar *israelensis*, along with their corresponding amino acid (Aa) sequence. Changes in the optimized nucleotide sequence are shown in capital letters.

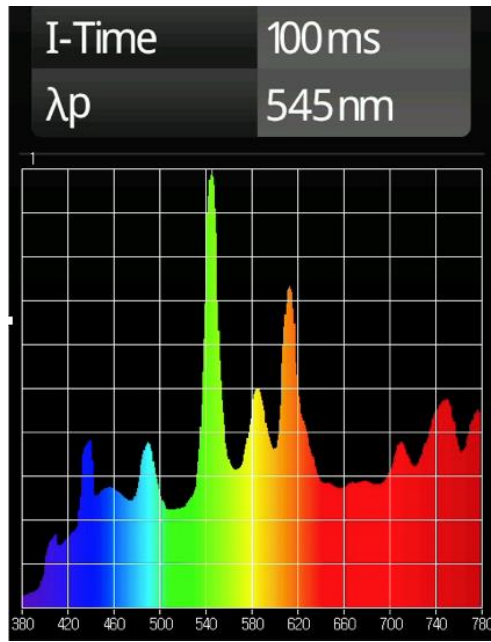

**Supplementary figure 2.** Light spectrum used for maturation of somatic embryos and plant regeneration of coffee, *C. arabica*.
